# Supplementary material for: Impact of post-decannulation high fever on mortality in patients with severe ARDS treated with veno-venous ECMO: a multicenter retrospective study
Source: Research Square preprint supplement (doi:10.21203/rs.3.rs-7066844/v1), 2025-07-22
Supplement: Supplementary file 1 [file 8c3d26f0fe8ec1c090713d32.docx]

**Table S2. Baseline characteristics of the subjects without infection at ECMO decannulation**

|  | **High fever (+)**  **(n = 94)** | **High fever (-)**  **(n = 360)** |  | **P** |
| --- | --- | --- | --- | --- |
| Age, y | 52.0 (42.8-63.0) | 58.5 (49.0-66.0) |  | 0.001 |
| Sex, male, *n* (%) | 69 (73.4) | 280 (77.8) |  | 0.371 |
| BMI, kg/m2,a | 26.4 (22.6-30.5) | 26.4 (23.1-30.7) |  | 0.562 |
| Past medical history |  |  |  |  |
| Chronic kidney disease, *n* (%) | 5 (5.3) | 33 (9.2) |  | 0.208 |
| COLD, *n* (%) | 9 (9.6) | 51 (14.2) |  | 0.226 |
| Interval from the start of MV to ECMO initiation, daysb | 2.0 (1.0-4.3) | 2.0 (1.0-4.0) |  | 0.597 |
| Primary etiology of ARDS, *n* (%) |  |  |  | 0.588 |
| Bacterial pneumonia | 16 (17.0) | 52 (14.4) |  |  |
| Viral pneumonia | 49 (52.1) | 209 (58.1) |  |  |
| Other pneumonia | 24 (25.5) | 74 (20.6) |  |  |
| Extra-pulmonary | 5 (5.3) | 25 (6.9) |  |  |
| Murray lung injury scorec | 3.25 (3.00-3.50) | 3.25 (2.75-3.50) |  | 0.109 |
| Use of neuromuscular blockers during ECMO, *n* (%)d | 65 (69.9) | 196 (54.4) |  | 0.006 |
| Steroid during ECMO, *n* (%) | 50 (53.8) | 247 (69.0) |  | 0.007 |
| ECMO duration, dayse | 10 (7-15) | 9 (7-14) |  | 0.266 |
| At ECMOdecannulation |  |  |  |  |
| Use of vasopressor, *n* (%)f | 32 (34.0) | 133 (37.3) |  | 0.564 |
| P/F ratiog | 234±11 | 252±6 |  | 0.131 |
| PaCO2, mmHgh | 46±1 | 45±1 |  | 0.605 |
| PEEP values, cmH2Oi | 10 (8-12) | 10 (8-12) |  | 0.263 |
| Dynamic driving pressure, cmH2Oj | 11 (8-12) | 11 (7-12) |  | 0.463 |

Data are presented as the medians and interquartile ranges (25th-75th percentile), mean ± standard deviation or as absolute frequencies with percentages.

Abbreviations: BMI, body mass index; COLD, chronic obstructive lung disease; MV, mechanical ventilation; ECMO, extracorporeal membrane oxygenation; ARDS, acute respiratory distress syndrome; PF ratio, PaO2/FIO2 ratio; PEEP, positive end-expiratory pressure.

aMissing value = 1.

bMissing value = 1.

cMissing value = 19.

dMissing value = 1.

eMissing value = 1.

fMissing value = 3.

gMissing value = 14.

hMissing value = 5.

iMissing value = 13.

jMissing value = 51.
