# Supplementary material for: Impact of post-decannulation high fever on mortality in patients with severe ARDS treated with veno-venous ECMO: a multicenter retrospective study
Source: Research Square preprint supplement (doi:10.21203/rs.3.rs-7066844/v1), 2025-07-22
Supplement: Supplementary file 2 [file dd7ae02248cab8946962cc59.docx]

**Table S1. Baseline characteristics of the subjects with infection at ECMO decannulation**

|  | **High fever (+)**  **(n = 27)** | **High fever (-)**  **(n = 41)** | **P** |
| --- | --- | --- | --- |
| Age, y | 62.0 (50.0-70.0) | 62.0 (53.5-67.0) | 0.960 |
| Sex, male, *n* (%) | 22 (81.5) | 32 (78.1) | 0.731 |
| BMI, kg/m2 | 25.9 (23.3-29.9) | 25.4 (22.4-29.0) | 0.344 |
| Past medical history |  |  |  |
| Chronic kidney disease, *n* (%) | 6 (5.0) | 36 (9.0) | 0.134 |
| COLD, *n* (%) | 1 (3.7) | 3 (7.3) | 0.534 |
| Interval from the start of MV to ECMO initiation, days | 3.0 (1.0-4.0) | 2.0 (1.0-4.0) | 0.833 |
| Primary etiology of ARDS, *n* (%) |  |  | 0.737 |
| Bacterial pneumonia | 4 (14.8) | 6 (14.6) |  |
| Viral pneumonia | 15 (55.6) | 27 (65.9) |  |
| Other pneumonia | 5 (18.5) | 6 (14.6) |  |
| Extra-pulmonary | 3 (11.1) | 2 (4.9) |  |
| Murray lung injury scorea | 3.25 (2.75-3.50) | 3.25 (3.00-3.25) | 0.444 |
| Use of neuromuscular blockers during ECMO, *n* (%) | 16 (59.3) | 27 (65.9) | 0.582 |
| Steroid during ECMO, *n* (%) | 17 (63.0) | 33 (80.5) | 0.112 |
| ECMO duration, days | 10 (8-18) | 11 (8-19) | 0.895 |
| At ECMO decannulation |  |  |  |
| Use of vasopressor, *n* (%)b | 15 (57.7) | 16 (39.0) | 0.135 |
| P/F ratio | 218±16 | 213±13 | 0.771 |
| PaCO2, mmHg | 44±2 | 46±2 | 0.456 |
| PEEP values, cmH2Oc | 10 (8-12) | 10 (8-12) | 0.740 |
| Dynamic driving pressure, cmH2Od | 12 (9.5-13.3) | 11 (4.3-13.5) | 0.144 |
| Infection site |  |  | 0.319 |
| Lung | 12 (44.4) | 21 (51.2) |  |
| Device | 11 (40.7) | 10 (24.4) |  |
| Others | 4 (14.8) | 10 (24.4) |  |

Data are presented as the medians and interquartile ranges (25th-75th percentile), mean ± standard deviation or as absolute frequencies with percentages.

Abbreviations: BMI, body mass index; COLD, chronic obstructive lung disease; MV, mechanical ventilation; ECMO, extracorporeal membrane oxygenation; ARDS, acute respiratory distress syndrome; PF ratio, PaO2/FIO2 ratio; PEEP, positive end-expiratory pressure.

aMissing value = 5.

bMissing value = 1.

cMissing value = 2.

dMissing value = 6.
